# Supplementary material for: A new reference-quality precipitation gauge wind shield
Source: Copernicus journal article supplement (doi:10.5194/amt-16-5647-2023), 2023-11-22
Supplement: Supplementary file 1 [file amt-16-5647-2023-supplement.pdf]

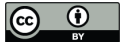

*Supplement of*

## **A new reference-quality precipitation gauge wind shield**

**John Kochendorfer et al.**

*Correspondence to:* John Kochendorfer ([john.kochendorfer@noaa.gov](mailto:john.kochendorfer@noaa.gov))

The copyright of individual parts of the supplement might differ from the article licence.

### Chainlink Snow Fence Parts List and Cost

| Part                                             | Supplier                             | Qty needed | Cost ea. | Shipping         | Total (No Shipping) | With Shipping      |
|--------------------------------------------------|--------------------------------------|------------|----------|------------------|---------------------|--------------------|
| 4 x 6 foot Fence Panels                          | American Fence & Supply Co.          | 12         | \$ 89.30 | \$ 735.00        | \$ 1,071.60         | \$ 1,806.60        |
| Frame Hinge 1 3/8 x 5/8 Female                   | Chainlinkfittings.com                | 12         | \$ 1.11  |                  | \$ 13.32            | \$ 13.32           |
| 1 3/8 x 5/8 Male Post Hinge                      | Chainlinkfittings.com                | 4          | \$ 1.71  |                  | \$ 6.84             | \$ 6.84            |
| Panel Clamp 1 3/8 x 1 3/8 set                    | Chainlinkfittings.com                | 40         | \$ 1.13  |                  | \$ 45.20            | \$ 45.20           |
| 5/16 x 1 1/4 Carriage bolt and nut for Panel Cl  | Chainlinkfittings.com                | 40         | \$ 0.19  |                  | \$ 7.60             | \$ 7.60            |
| 5/8 Bolts and nuts for Frame Hinge pivot         | Tractor Supply                       | 4          | \$ 0.90  |                  | \$ 3.60             | \$ 3.60            |
| 1 3/8 x 1 3/8 end rail clamp                     | Chainlinkfittings.com                | 32         | \$ 1.25  | \$ 22.01         | \$ 40.00            | \$ 62.01           |
| 5/16 x 2 " carriage bolts and nuts               | Chainlinkfittings.com                | 32         | \$ 0.32  |                  | \$ 10.24            | \$ 10.24           |
| 4 foot high EZ slats box for 10 foot             | JustSlats.com                        | 7          | \$ 50.00 | \$ 35.00         | \$ 350.00           | \$ 385.00          |
| Geoblock for leg base                            |                                      | 1.5        | \$ 25.00 |                  | \$ 37.50            | \$ 37.50           |
| anchors for wind loading                         |                                      | 4          | \$ 25.00 |                  | \$ 100.00           | \$ 100.00          |
| 3/4 x 2 3/4 x 1/4 square washer                  | Tacoma Screw Products                | 12         | \$ 2.32  |                  | \$ 27.84            | \$ 27.84           |
| 3/8 x 2 inch carriage bolt and nut for frame hin | Chainlinkfittings.com                | 16         | \$ 0.45  |                  | \$ 7.20             | \$ 7.20            |
| 1 inch tubing for legs and bracing in feet       | Home Depot (Use chain link top rail) | 200        | \$ 1.63  |                  | \$ 326.00           | \$ 326.00          |
| <b>Totals</b>                                    |                                      |            |          | <b>\$ 792.01</b> | <b>\$ 2,046.94</b>  | <b>\$ 2,838.95</b> |

Estimate for labor of installation:

2 people for 4 hours

8 hours total labor
